# Supplementary material for: β-Catenin–regulated myeloid cell adhesion and migration determine wound healing
Source: JCI journal article supplement (doi:10.1172/jci62059), 2014-05-15
Supplement: sd1 [file 1]

## Supplementary Figure Legends

*Figure S1. Schematic of myeloid lineage reporter mouse model used in this study.*

(A) The *Lyzs-Cre* mouse was crossed with *Gt(ROSA)26Sor<sup>tm1(EYFP)Cos/J</sup>* mice to label cells expressing *Lysz*. In order to monitor  $\beta$ -catenin/Tcf transcriptional activity, these mice were bred with the Tcf reporter mouse. Tcf transcriptional activity is identified by the production of  $\beta$ -gal. These mice were used in lineage studies during wound repair. (B) Flow cytometry analysis of bone marrow derived macrophages indicates that 87% of EYFP-positive myeloid cells are F4/80-positive.

*Figure S2. Bone marrow derived macrophages of *Lysz-Cre;ROSA-EYFP* mouse are EYFP<sup>+</sup>.*

(A) Bone marrow derived cell culture from a *ROSA-EYFP* mouse expanded in macrophage specific medium. (B) Bone marrow cell culture from *Lysz-Cre;ROSA-EYFP* mouse showing EYFP-positive macrophage cells. (C) Flow cytometry analysis of bone marrow derived macrophages from *ROSA-EYFP* mouse, showing absence of EYFP positive cells. (D) Flow cytometry analysis of bone marrow derived macrophages from *Lysz-Cre; ROSA-EYFP* mouse, showing a big population of EYFP positive cells.

*Figure S3. Schematic of myeloid lineage  $\beta$ -catenin deficient reporter mouse model used in this study.*

(A) Lysz-Cre transgenic mice were crossed with  $Catnb^{tm2Kem(fl/fl)}$ .  $\beta$ -catenin is deleted when Cre-recombinase is expressed in mice expressing the  $Catnb^{tm2Kem(fl/fl)}$  allele. These mice were crossed with an EYFP reporter mouse ( $Gt(ROSA)26Sor^{tm1(EYFP)Cos/J}$ ). In order to monitor  $\beta$ -catenin/Tcf transcriptional activity, these mice were then bred with the Tcf reporter mouse. Tcf transcriptional activity is identified in these mice (Lysz-Cre;ROSA-EYFP;Tcf) by the production of  $\beta$ -gal. (B) Quantitative RT-PCR analysis, showing decreased expression of the  $\beta$ -catenin/Tcf target *Axin2* in  $\beta$ -catenin-deficient bone marrow derived macrophages from Lysz-Cre; $Catnb^{tm2Kem(fl/fl)}$ ;ROSA.EYFP mice compared to control littermates. (C) Western blot analysis of  $\beta$ -catenin-deficient bone marrow derived macrophages show a substantial decrease in  $\beta$ -catenin at protein level in compare to control mice. (D) Relative wound bed quantification shows a significant increase in the wound area bed in Lysz.Cre; $Catnb^{tm2Kem}$  compared to control mice. Data represent the mean $\pm$  95% confidence interval of 6 mice.

*Figure S4. A subpopulation of myeloid lineage cells change their morphology during wound healing.*

Double immunofluorescence staining of the healing dermis in a Lysz-Cre;ROSA-EYFP mouse, stained with EYFP and other antibodies. (A) co-staining with F4/80. Arrows show cells that are positive only for EYFP while arrowheads show cells that are positive for EYFP and F4/80. (B) Co-staining with an antibody to FAP. Arrows shows cells that are positive only for FAP while arrowheads show cells that are positive for EYFP and FAP. (C) Co-staining with an antibody to  $\alpha$ -SMA. Arrows show cells that are positive only for  $\alpha$ -SMA while arrowheads show cells that are positive for EYFP and  $\alpha$ -SMA. Data represent the average frequency from 8 mice.

*Figure S5. A subpopulation of EYFP-positive myeloid cells express FAP and  $\alpha$ -SMA in healing dermis at the end of the healing process.*

Double immunofluorescence staining of healing dermis in Lysz-Cre;ROSA-EYFP mouse with EYFP and FAP in (A) or  $\alpha$ -SMA in (B). Arrowheads show cells which are positive only for FAP (A) or  $\alpha$ -SMA (B) while arrows show cells that are positive for EYFP and the specified marker, indicating that a group of FAP or  $\alpha$ -SMA positive cells are myeloid lineage progeny.

*Figure S6.  $\beta$ -catenin mediates the development of fibroblastic phenotype of myeloid lineage cells.*

(A) Bone marrow derived cells from a Lysz-Cre;ROSA-EYFP mouse grown in macrophage specific medium (MSM), showing cells expressing the macrophage marker Mac1. Arrowheads show round shaped macrophage cells which are EYFP-positive and Mac1-positive. (B) A subpopulation of bone marrow derived macrophages that are deprived of MSM, showing a change in their morphology to spindle shape fibroblast-like cells that do not express Mac1. Arrows show that fibroblast-like cells are EYFP-positive and Mac1-negative. Arrowhead points to rounded shape cells showing a macrophage phenotype that are EYFP-positive and Mac1-positive. (C) Quantitative RT-PCR showing down-regulation of genes characteristically expressed by macrophages, and up-regulation of genes characteristically expressed by fibroblasts in cultured macrophages when deprived of MSM. (D) Quantification of percentage of cells that are positive for each marker in macrophage medium compare to DMEM medium. (E) The phenotypes of bone marrow derived macrophage cells cultured in either MSM medium (top panel) or deprived of MSM medium (lower panel). Arrows show rounded cells characteristic of macrophages while arrowheads show spindle shape fibroblasts like cells. Macrophages which are deprived of MSM medium change their phenotype to a fibroblast-like shaped cell in cell from Lysz.Cre; ROSA-

EYFP mice but not in cells from *Lyzs.Cre;Catnb<sup>tm2Kem</sup>;ROSA-EYFP*. (F) Quantitative RT-PCR showing down-regulation of genes characteristically expressed in fibroblast and up-regulation of genes characteristically expressed in macrophages. Data represent the mean $\pm$  95% confidence interval of 6 mice.

*Figure S7. Peripheral fibroblasts of Lysz-Cre;ROSA-EYFP mouse do not produce EYFP in macrophage specific media.*

Peripheral fibroblasts of *Lysz-Cre;ROSA-EYFP* mouse were cultured in macrophage specific media for 96 hours. Note that unlike bone marrow cells (A), established fibroblast do not produce EYFP protein (B), indicating that fibroblasts do not express *lysozyme* while exposed to MSM.

*Figure S8. F4/80 positive macrophages and  $\beta$ -catenin+ cells are enriched in human hypertrophic scar in compare with normal scar.*

Accumulation of macrophages and  $\beta$ -catenin positive cells in the dermal component of hypertrophic scars compared with that observed in normal scars. This, shows a correlation between numbers of F4/80+ cells and  $\beta$ -catenin accumulation. Arrows show  $\beta$ -catenin positive cells in the upper panels and F4/80+ cells in the lower panels. Data in right panel represent the mean $\pm$  95% confidence interval of 10 hypertrophic scar samples and 3 normal scar samples.

*Table S1. Tcf transcriptionally active cells express genes characteristically expressed by macrophages during skin healing.*

LacZ-expressing cells were sorted from digested granulation tissue using fluorescein di- $\beta$ -D-galactopyranoside subjected to microarray. The table summarizes the relative expression ratio of

genes characteristically expressed by macrophages between  $\beta$ -gal-positive cells with active  $\beta$ -catenin/Tcf signalling and  $\beta$ -gal-negative cells.

*Table S2. Down-regulation of genes attributed to migration in macrophages lacking  $\beta$ -catenin.*

Data from the microarray analysis (Geo accession number: GSE52163) shows down-regulation of genes attributed to macrophage migration in macrophages from Lyzs.Cre;Catnb<sup>tm2Kem</sup>;ROSA-EYFP in comparison with control macrophages.

*Table S3. Modulation of Integrin gene family in macrophages lacking  $\beta$ -catenin.*

Integrin family member genes differentially expressed in the microarray analysis of expression in macrophages from Lyzs.Cre;Catnb<sup>tm2Kem</sup>;ROSA-EYFP mice compared with control macrophages.

*Table S4. Modulation of Adam gene family in macrophages lacking  $\beta$ -catenin.*

Summary of Adam gene family differential expression in cDNA microarray analysis of RNA from macrophages from Lyzs.Cre;Catnb<sup>tm2Kem</sup>;ROSA-EYFP mice compared with control macrophages.

# Figure S1

A

Lyzs.Cre; Rosa.EYFP; TCF

Lysozyme promoter — Cre

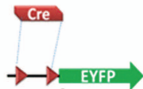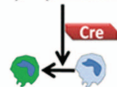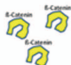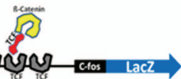

B

*EYFP<sup>+</sup> cells*

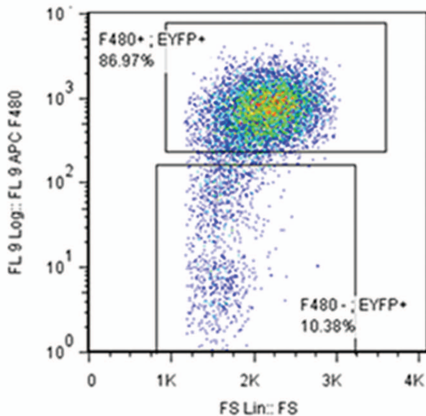

# Figure S2

Bone marrow in macrophage medium

Dapi/EYFP

**A** ROSA-EYFP

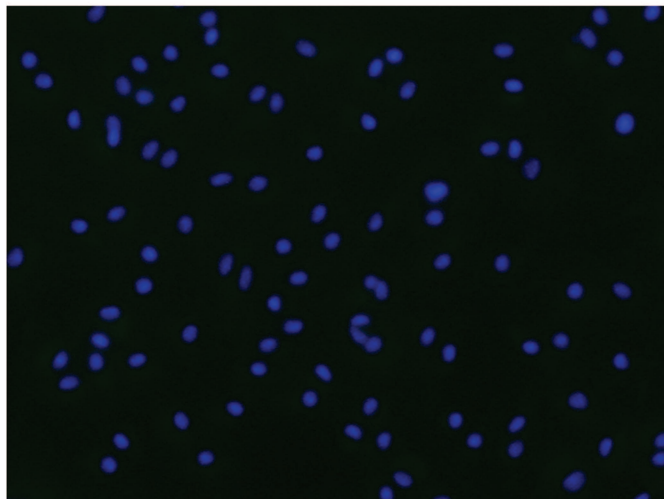

**B** Lyzs-Cre; ROSA-EYFP

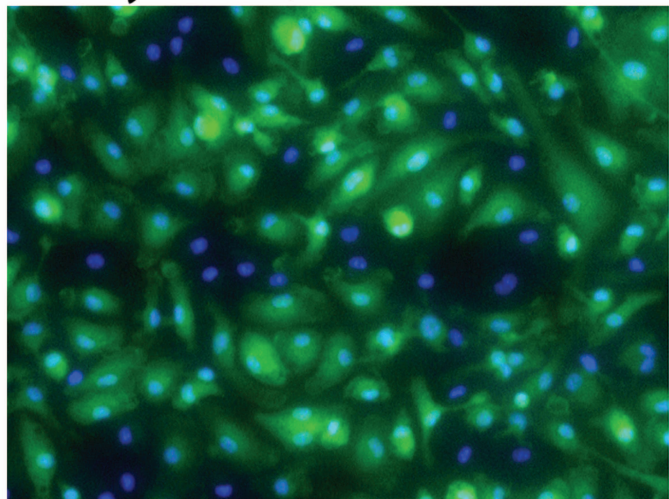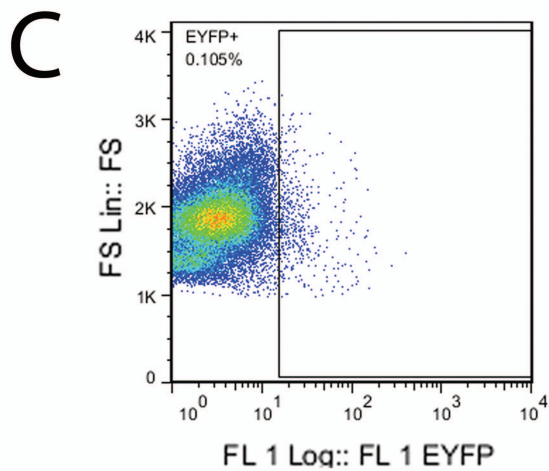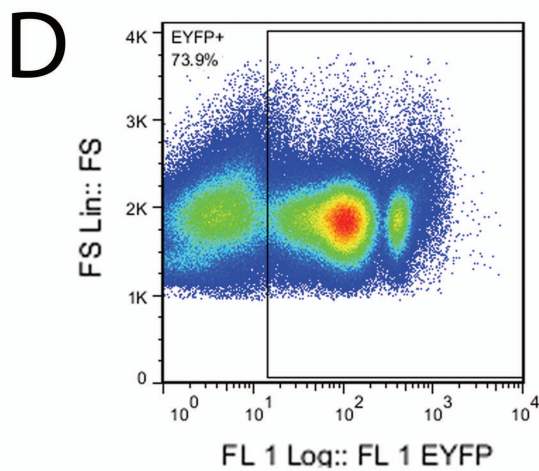

Figure S3

A

Lyzs.Cre; *Catnb*<sup>tm2Kem(fl/fl)</sup>; Rosa.EYFP; TCF

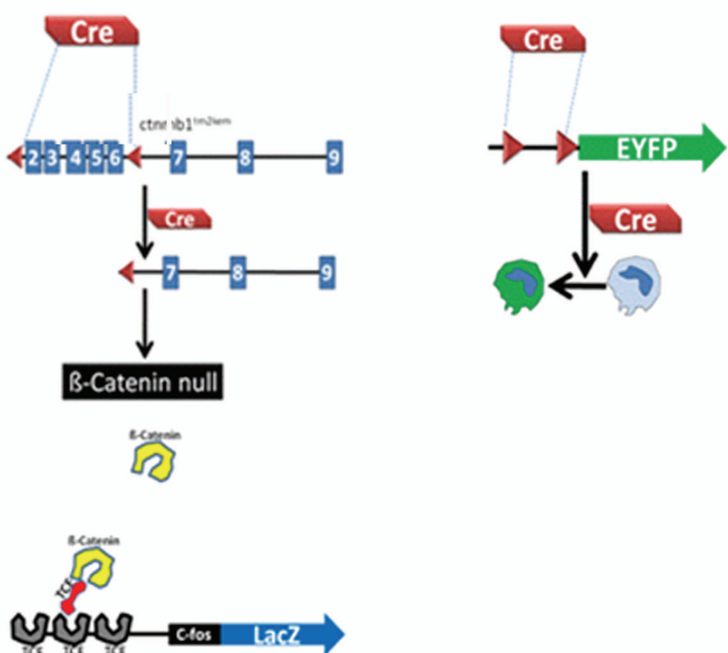

B

□ *Catnb*<sup>tm2Kem(fl/fl)</sup>  
 ■ Lyzs.Cre;*Catnb*<sup>tm2Kem(fl/fl)</sup>

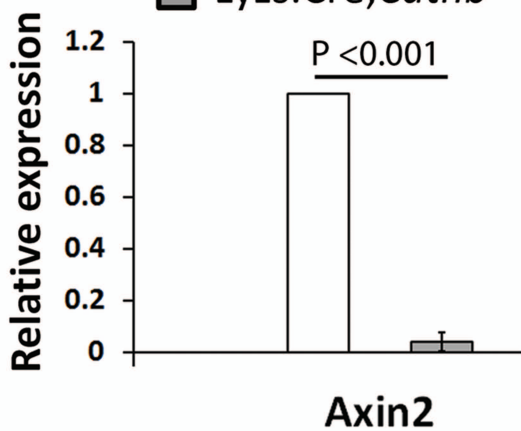

C

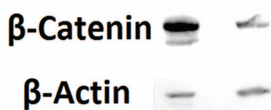

D

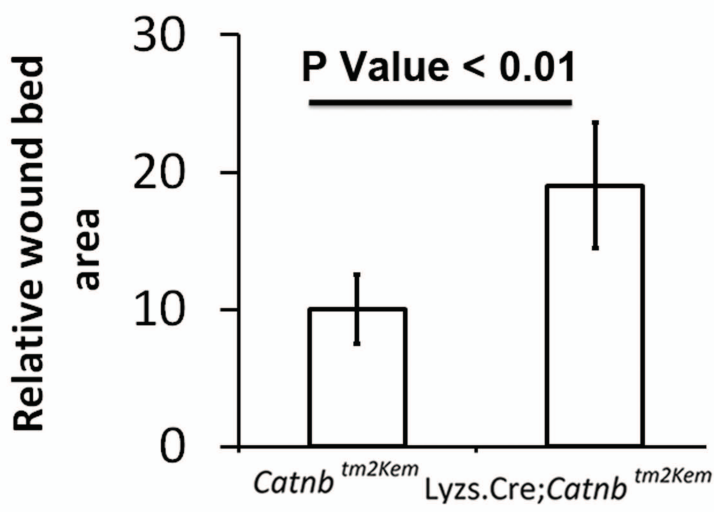

# Figure S4

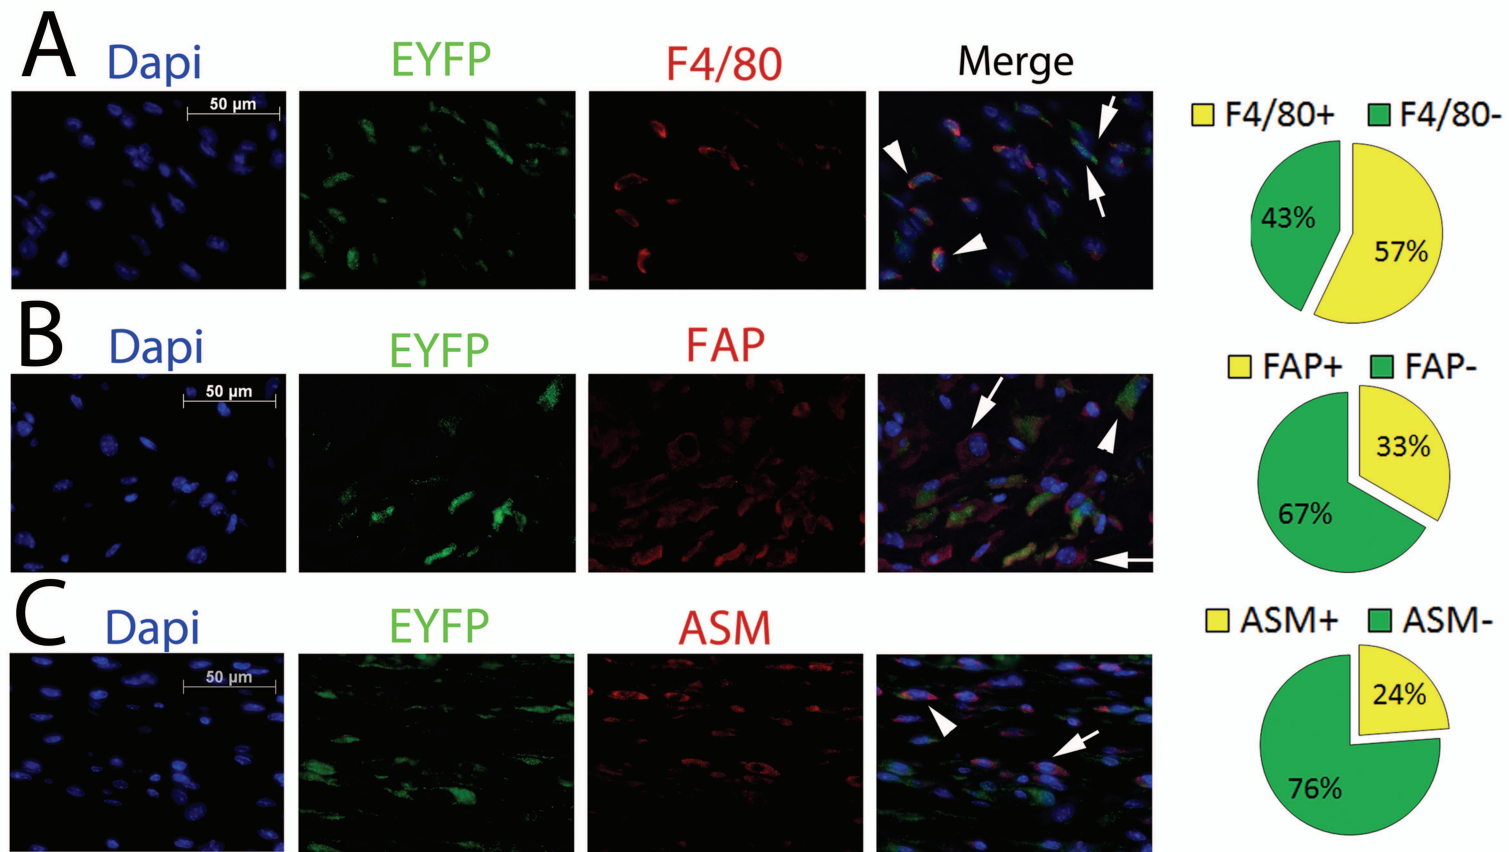

# Figure S5

## A

Dapi

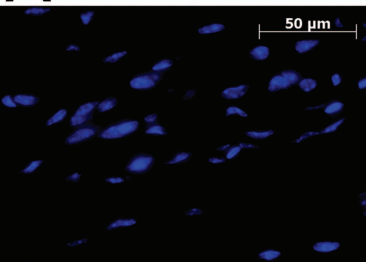

EYFP

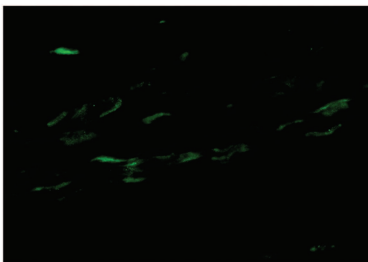

FAP

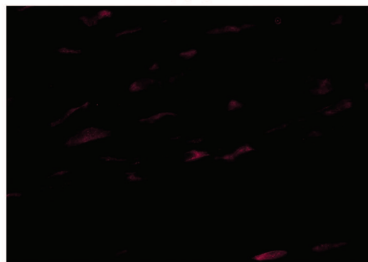

Merge

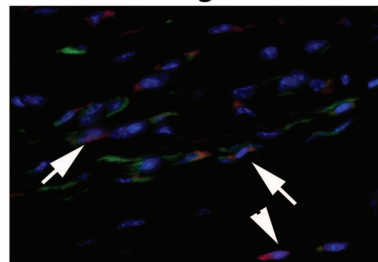

## B

Dapi

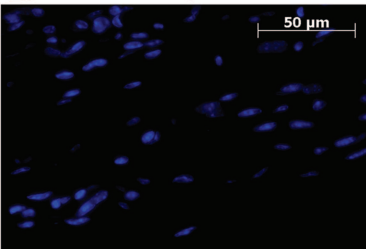

EYFP

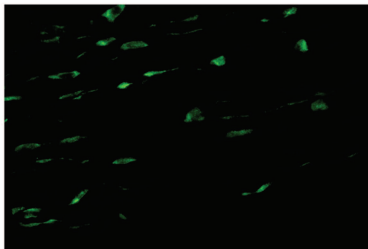

ASM

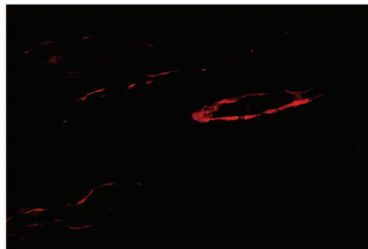

Merge

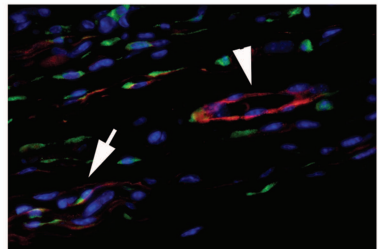

# Figure S6

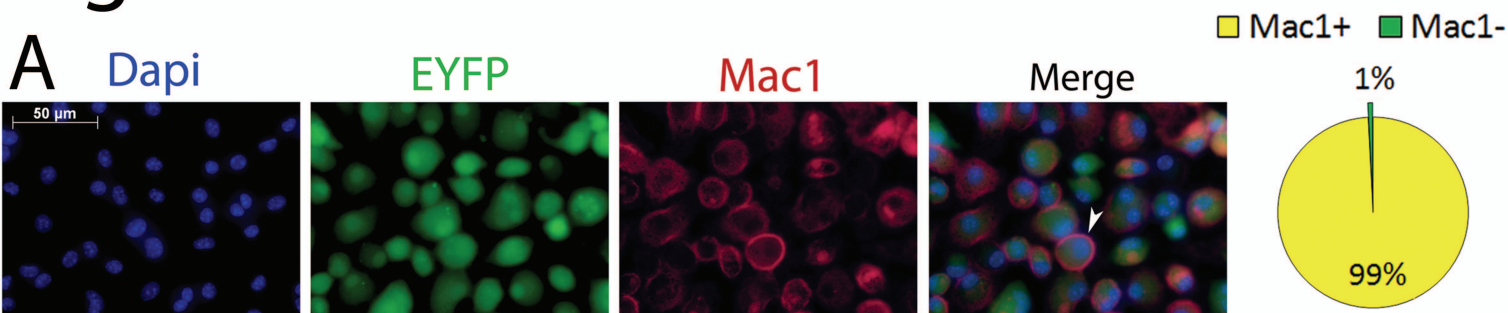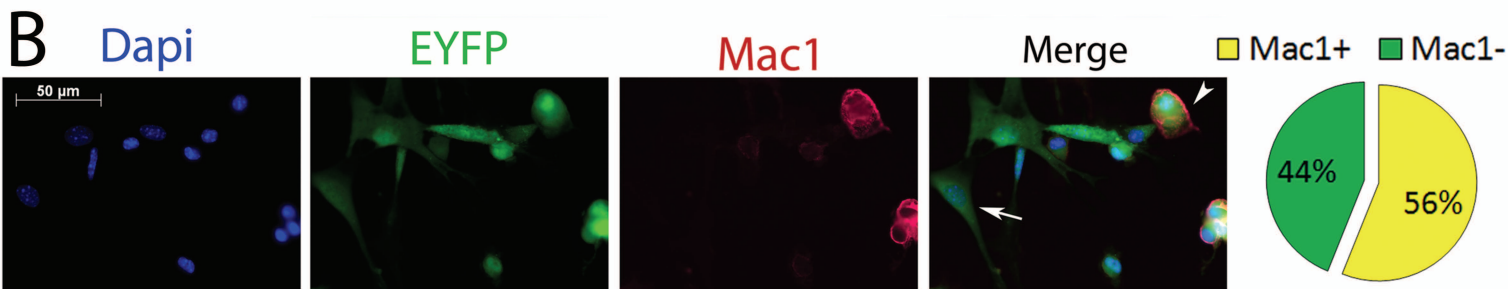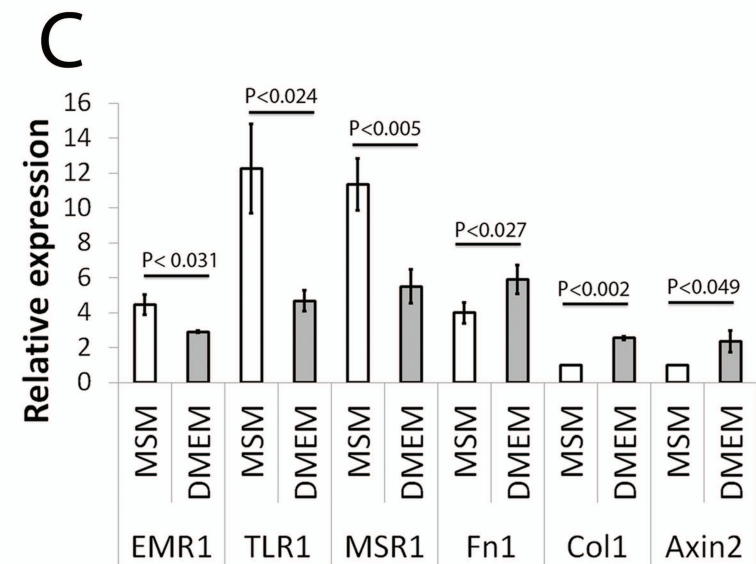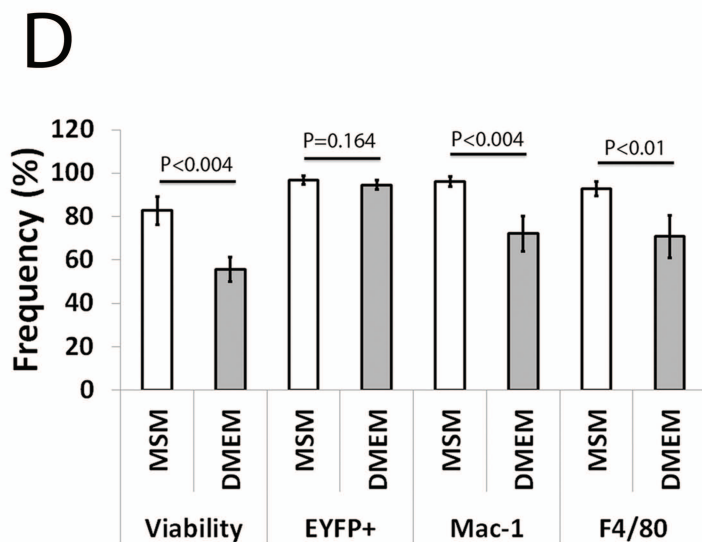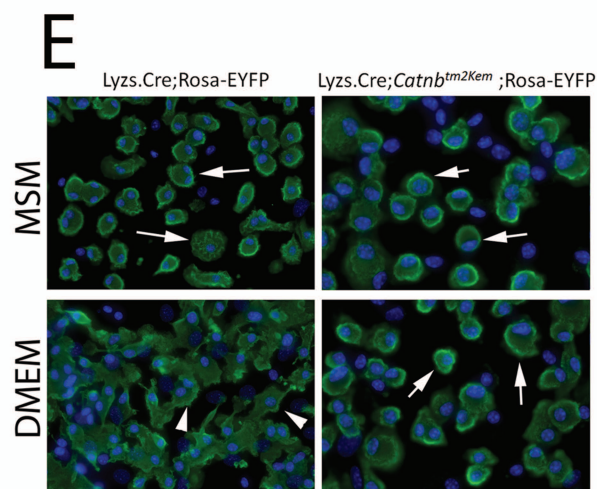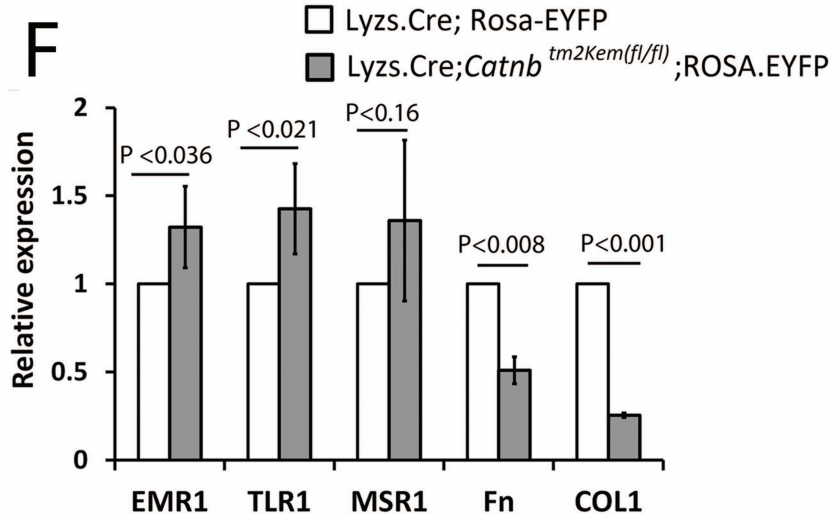

Figure S7

A

DAPI / EYFP / ASM

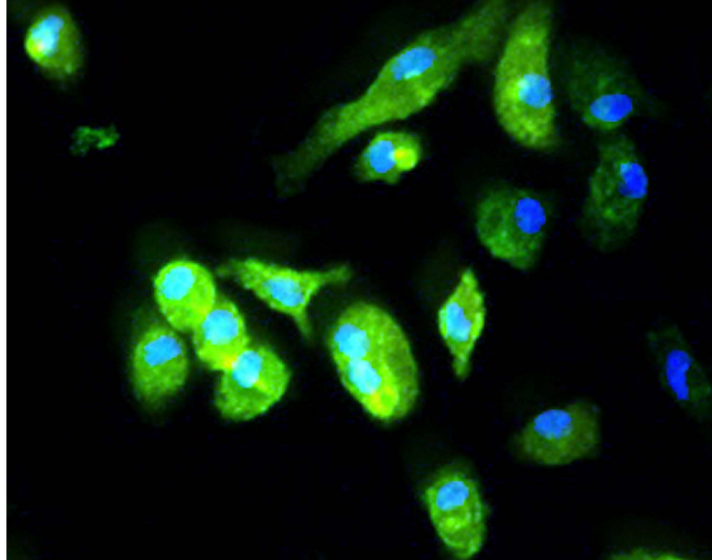

B

DAPI / EYFP / ASM

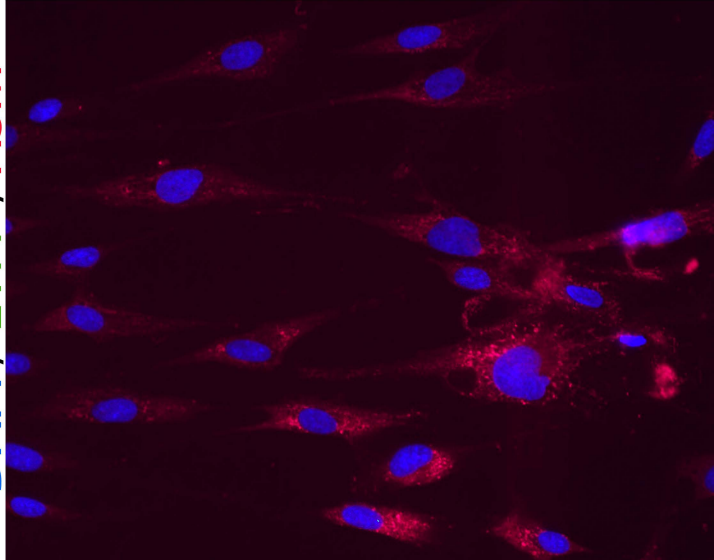

Figure S8

## Normal Scar

## Hypertrophic Scar

Beta-catenin

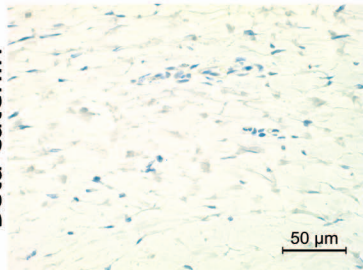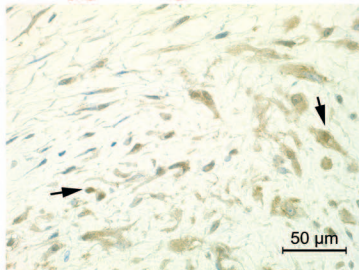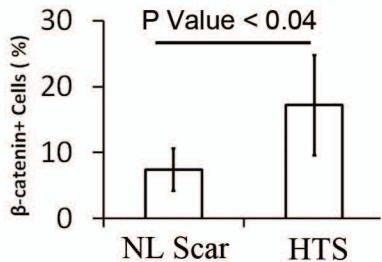

F4/80

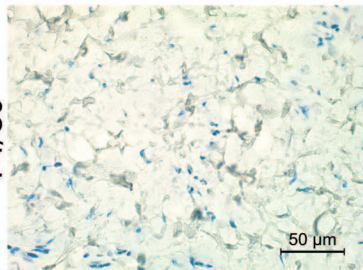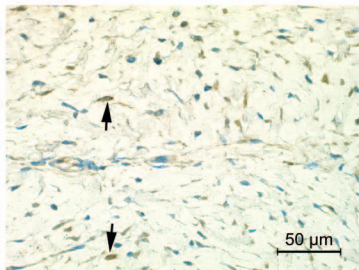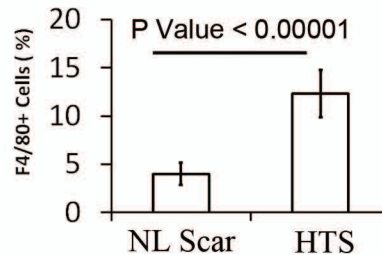

**Table S1. Tcf transcriptionally active cells express genes characteristically expressed by macrophages during skin healing.**

|       | $\beta$ -Gal+ / $\beta$ -Gal- |
|-------|-------------------------------|
| Tlr4  | 2.67                          |
| Tlr6  | 2.83                          |
| CD22  | 3.9                           |
| CD33  | 4.29                          |
| CD93  | 5.99                          |
| CD11b | 6.5                           |
| CD68  | 9.8                           |
| CD204 | 11.67                         |
| MSR1  | 11.67                         |
| CD84  | 13.2                          |
| Tlr1  | 13.24                         |
| F4/80 | 26.9                          |

**Table S2. Genes Attributed to Macrophage Migration**

| RefSeq       | Gene.Symbol | Gene name                       | KO/WT    |
|--------------|-------------|---------------------------------|----------|
| NM_008118    | Gif         | Glycosylation-inhibiting factor | 0.562284 |
| NM_011223    | Pxn         | Paxillin                        | 0.738619 |
| NM_001162365 | Ptk2b       | Protein tyrosine kinase 2 beta  | 0.773482 |
| NM_010576    | Itga4       | VLA-4                           | 0.788286 |
| NM_020505    | Vav3        | Vav3 oncogene                   | 0.810314 |
| NM_001111316 | Ptpnc       | CD 45, role in migration        | 0.894839 |
| NM_010736    | Ltbr        | Lymphotoxin B receptor          | 0.947183 |
| NM_001082960 | Itgam       | Mac-1                           | 0.971535 |

**Table S3. Adam Gene Family**

| RefSeq             | Gene.Symbol | KO/WT    | RefSeq             | Gene.Symbol | KO/WT    |
|--------------------|-------------|----------|--------------------|-------------|----------|
| NM_010084          | Adam18      | 0.537267 | NM_177872          | Adamts3     | 0.905477 |
| NM_021475          | Adamdec1    | 0.566615 | NM_177872          | Adamts3     | 0.913203 |
| NM_177872          | Adamts3     | 0.590272 | NM_177872          | Adamts3     | 0.916544 |
| NM_001033877       | Adamts17    | 0.617274 | NM_029967          | Adamtsl1    | 0.923991 |
| NM_007402          | Adam7       | 0.620423 | NM_172845          | Adamts4     | 0.943594 |
| NM_175506          | Adamts19    | 0.622105 | NM_013906          | Adamts8     | 0.968468 |
| NM_175939          | Adam29      | 0.629918 | NM_001003911       | Adamts7     | 0.968973 |
| NM_145745          | Adam34      | 0.665905 | NM_153397          | Adam32      | 0.971559 |
| NM_177872          | Adamts3     | 0.680757 | NM_007400          | Adam12      | 0.976602 |
| NM_172125          | Adam1b      | 0.702741 | NM_001081401       | Adamts3     | 0.976721 |
| NM_177872          | Adamts3     | 0.708564 | NM_177872          | Adamts3     | 0.978318 |
| NM_001001322       | Adamts13    | 0.70957  | NM_033615          | Adam33      | 1.012868 |
| NM_011781          | Adam25      | 0.7223   | NM_001009547       | Adam26b     | 1.014347 |
| NM_010086          | Adam24      | 0.726665 | NM_007401          | Adam5       | 1.01455  |
| NM_145745          | Adam34      | 0.743746 | NM_001081127       | Adamts14    | 1.037296 |
| NM_009616          | Adam19      | 0.750183 | NM_009618          | Adam2       | 1.039012 |
| NM_172466          | Adamts18    | 0.750865 | NM_177872          | Adamts3     | 1.049208 |
| NM_177872          | Adamts3     | 0.763838 | NM_007404          | Adam9       | 1.054751 |
| NM_001037722       | Adam15      | 0.767754 | NM_001033877       | Adamts17    | 1.070653 |
| NM_010082          | Adam28      | 0.7764   | NM_177872          | Adamts3     | 1.079829 |
| NM_174885          | Adam6a      | 0.778271 | NM_013906          | Adamts8     | 1.097105 |
| NM_001037722       | Adam15      | 0.787446 | NM_175501          | Adamts12    | 1.110269 |
| NM_029967          | Adamtsl1    | 0.788609 | NM_009615          | Adam17      | 1.110969 |
| NM_177431          | Adamts20    | 0.789541 | NM_001081020       | Adamts6     | 1.117838 |
| NM_007399          | Adam10      | 0.793108 | NM_172126          | Adam1a      | 1.155448 |
| NM_001007220       | Adam22      | 0.795107 | NM_001113548       | Adamtsl5    | 1.182471 |
| NM_027665          | Adam30      | 0.803075 | NM_177872          | Adamts3     | 1.191522 |
| NM_001110778       | Adam11      | 0.805177 | NM_144899          | Adamtsl4    | 1.230599 |
| NM_001025380       | Adam39      | 0.811513 | NM_177872          | Adamts3     | 1.230684 |
| NM_009619          | Adam3       | 0.821438 | NM_177872          | Adamts3     | 1.291045 |
| NM_009620          | Adam4       | 0.835456 | NM_172619          | Adamts10    | 1.306561 |
| ENSMUST00000094237 | Adamtsl3    | 0.836585 | NM_175314          | Adamts9     | 1.464681 |
| NM_001033877       | Adamts17    | 0.846534 | NM_175314          | Adamts9     | 1.57999  |
| NM_001009545       | Adam6b      | 0.846981 | NM_177872          | Adamts3     | 1.612718 |
| NM_029981          | Adamtsl2    | 0.84956  | ENSMUST00000049189 | Adamts9     | 1.691706 |
| NM_001024139       | Adamts15    | 0.852374 | NM_175314          | Adamts9     | 1.730321 |
| NM_001033877       | Adamts17    | 0.853589 | NM_175314          | Adamts9     | 1.85765  |
| NM_001033877       | Adamts17    | 0.856495 | NM_011780          | Adam23      | 2.06231  |
| NM_177872          | Adamts3     | 0.872939 | NM_175314          | Adamts9     | 2.147783 |
| NM_010085          | Adam26a     | 0.882167 | NM_175314          | Adamts9     | 2.409637 |
| NM_007403          | Adam8       | 0.891508 | NM_175643          | Adamts2     | 2.512744 |
| NM_172053          | Adamts16    | 0.899952 | NM_009621          | Adamts1     | 3.00974  |
| NM_020330          | Adam21      | 0.903909 | NM_011782          | Adamts5     | 3.04486  |

**Table S4. Integrins**

| RefSeq             | Gene.Symbol | KO/WT    |
|--------------------|-------------|----------|
| NM_008400          | Itgal       | 0.408643 |
| NM_001001309       | Itga8       | 0.470144 |
| NM_133721          | Itga9       | 0.583581 |
| NM_001005608       | Itgb4       | 0.655604 |
| NM_001029872       | Itgad       | 0.717612 |
| NM_010577          | Itga5       | 0.761503 |
| NM_010576          | Itga4       | 0.788286 |
| NM_008402          | Itgav       | 0.801325 |
| NM_008399          | Itgae       | 0.844142 |
| NM_010578          | Itgb1       | 0.85869  |
| NM_027120          | Itgb1bp3    | 0.86017  |
| NM_008405          | Itgb2l      | 0.882582 |
| NM_001159564       | Itgb6       | 0.898635 |
| NM_008403          | Itgb1bp1    | 0.93463  |
| NM_001081053       | Itga10      | 0.952872 |
| NM_001082960       | Itgam       | 0.971535 |
| NM_145467          | Itgbl1      | 0.974079 |
| NM_010578          | Itgb1       | 1.006318 |
| NM_016780          | Itgb3       | 1.019998 |
| NM_008397          | Itga6       | 1.040697 |
| NM_001005608       | Itgb4       | 1.047808 |
| NM_026348          | Itgb3bp     | 1.052541 |
| NM_176922          | Itga11      | 1.073923 |
| NM_013565          | Itga3       | 1.115873 |
| NM_013712          | Itgb1bp2    | 1.121421 |
| NM_177290          | Itgb8       | 1.138774 |
| NM_013566          | Itgb7       | 1.172588 |
| NM_008404          | Itgb2       | 1.200715 |
| NM_008398          | Itga7       | 1.211262 |
| NM_001145884       | Itgb5       | 1.323797 |
| NM_008396          | Itga2       | 1.34384  |
| NM_001033228       | Itga1       | 1.634017 |
| NM_010575          | Itga2b      | 1.774187 |
| ENSMUST00000106237 | Itgad       | 1.893578 |
| NM_021334          | Itgax       | 2.889488 |
